# Supplementary material
Source: publisher figshare collection journal article supplement (https://karger.figshare.com/ndownloader/files/22331439)
Supplement: Supplementary file 1 [file 22331439]

**Supplemental Table 1: Diagnostic criteria of Gorlin syndrome /** **Nevoid Basal Cell Carcinoma Syndrome**

| **Major criteria** |
| --- |
| Multiple basal cell carcinomas (BCCs) (>5 in a lifetime) or a BCC before age 30 years |
| Odontogenic keratocyst |
| Palmar/plantar pits (≥2) |
| Bilamellar calcification of the falx |
| First-degree relative with Gorlin syndrome |
| **Minor criteria** |
| Medulloblastoma (Childhood) |
| Lympho-mesenteric or pleural cysts |
| Macrocephaly (OFC >97th centile) |
| Cleft lip/palate |
| Vertebral/rib malformation: bifid/splayed/extra ribs; bifid vertebrae |
| Preaxial or postaxial polydactyly |
| Ovarian/cardiac fibromas |
| Ocular anomalies (e.g., cataract, developmental defects, and pigmentary changes of the retinal epithelium) |

Based one D Gareth Evans *et al.* and Bree and Shah 2011

Evans DG, Farndon PA. Nevoid Basal Cell Carcinoma Syndrome. 2002 Jun 20 [Updated 2018 Mar 29]. In: Adam MP, Ardinger HH, Pagon RA, et al., editors. GeneReviews® [Internet]. Seattle (WA): University of Washington, Seattle; 1993-2019.

Available from: *https://www.ncbi.nlm.nih.gov/sites/books/NBK1151/*

Bree AF, Shah MR; BCNS Colloquium Group.

Consensus statement from the first international colloquium on basal cell nevus syndrome (BCNS).

Am J Med Genet A. 2011 Sep;155A(9):2091-7. doi: 10.1002/ajmg.a.34128. Epub 2011 Aug 10.

PMID: 21834049
